# Supplementary material for: Seizures as Initial Presentation and Enduring Predisposition to Seizures in Autoimmune Encephalitis
Source: Hindawi journal article supplement (doi:10.1155/2024/6183939), 2024-01-01
Supplement: f1 [file 6183939.f1.docx]

Supplemental Figure 1: The flow chart of this study

Patients with AE (n=343)

Patients with antibody-positive AE (n=198)

Patients with antibody-negative AE (n=145)

AE patients onset with seizures (n=148)

AE patients onset with non-seizures (n=195)

AE patients onset with seizures (n=115)

AE patients onset with non-seizures (n=151)

AE patients onset with seizures (n=105)

AE patients onset with non-seizures (n=140)

AE patients onset with seizures (n=87)

AE patients onset with non-seizures (n=110)

6 months follow-up

12 months follow-up

24 months follow-up

Supplemental Figure 2: The application of anti-seizure medicines in AE patients onset with seizures.

Abbreviations: Valproate (VAP); Oxcarbazepine (OXZ); Levetiracetam (LEV); Phenobarbital (PB); Carbamazepine (CBZ); Lamotrigine (LTG); Benzodiazepines (BZP); Topiramate (TPM); Lacosamide (LCM)

Supplemental Figure 3: The application of anti-seizure medicines in AE patients onset with non-seizures.

Abbreviations: Valproate (VAP); Oxcarbazepine (OXZ); Levetiracetam (LEV); Topiramate (TPM); Benzodiazepines (BZP); Lamotrigine (LTG); Phenobarbital (PB); Carbamazepine (CBZ)

Supplemental Table 1: The clinical characteristics of seizures in AE patients onset with non-seizures.

| **Variables** | **Total (n=55)** | **Antibody-positive AE (38, 69.1%)** | **Antibody-negative AE (17, 30.9%)** | **P value** |
| --- | --- | --- | --- | --- |
| **Seizure type at onset** |  |  |  |  |
| Generalized n (%) | 8(14.5%) | 5(13.2%) | 3(17.6%) | 0.663 |
| Focal motor n (%) | 14(25.5%) | 11(28.9%) | 3(17.6%) | 0.374 |
| Focal non-motor n (%) | 7(12.7%) | 3(7.9%) | 4(23.5%) | 0.108 |
| Focal to bilateral n (%) | 37(67.3%) | 27(71.1%) | 10(58.8%) | 0.372 |
| Multiple seizure type n (%) | 11(20.0%) | 7(18.4%) | 4(23.5%) | 0.662 |
| **Seizure frequency at onset** |  |  |  |  |
| Daily n (%) | 30(54.5%) | 23(60.5%) | 7(41.2%) | 0.183 |
| Weekly n (%) | 7(12.7%) | 6(15.8%) | 1(5.9%) | 0.308 |
| Monthly n (%) | 18(32.7%) | 9(23.7%) | 9(52.9%) | 0.033 |
| Drug-resistant to ASMs at onset n (%) | 13(23.6%) | 8(21.1%) | 5(29.4%) | 0.500 |
| The number of received ASMs Median [IQR] | 2[1-2] | 2[1-2] | 2[1-3] | 0.539 |

Abbreviations: Anti-seizure medications (ASMs)
